# Supplementary material for: Constructing a surface spinel layer to stabilize the oxygen frame of Li-rich layered oxides
Source: Royal Society of Chemistry journal article supplement (doi:10.1039/d2qi01845d), 2022-01-01
Supplement: d2qi01845d1.pdf [file d2qi01845d1.pdf]

## Supporting information

### **Constructing a surface spinel layer to stabilize the oxygen frame of Li-rich layered oxides**

Xiaoyan Xie, Jiayang Cui, Zhenkun Liu, Zhuo Yao, Xiaokai Ding, Chenyu Liu\* and  
Dong Luo\*

Guangdong Provincial Key Laboratory of Plant Resources Biorefinery, School of  
Chemical Engineering and Light Industry, Guangdong University of Technology,  
Guangzhou 510006, China.

\*Corresponding authors:

Chenyu Liu (cy.liu@gdut.edu.cn); Dong Luo (luodong@gdut.edu.cn)

## List of contents

### 1. Supplementary Figs:

|                                                                                                                                                                                                                                                                                    |   |
|------------------------------------------------------------------------------------------------------------------------------------------------------------------------------------------------------------------------------------------------------------------------------------|---|
| <b>Figure S1.</b> Scanning electron microscope images of various CA-treatment: <b>a)</b> 50g/L CA-treatment and <b>b)</b> 210g/L CA-treatment. ....                                                                                                                                | 1 |
| <b>Figure S2.</b> Transmission electron microscope images of the as-prepared PRI materials. ....                                                                                                                                                                                   | 2 |
| <b>Figure S3.</b> Transmission electron microscope images of the as-prepared CA-LR materials. ....                                                                                                                                                                                 | 3 |
| <b>Figure S4.</b> Raman spectra before cycling. <b>a)</b> PRI, <b>b)</b> 50g/L-CA, <b>c)</b> 84g/L-CA and <b>d)</b> 210g/L-CA samples. ....                                                                                                                                        | 4 |
| <b>Figure S5.</b> Cycle voltammetry curves of the as-prepared pristine material at the scan rate of $0.1 \text{ mV s}^{-1}$ starting from the oxidation process under the 1 <sup>st</sup> and 2 <sup>nd</sup> cycle. ....                                                          | 5 |
| <b>Figure S6.</b> <b>a)</b> Initial galvanostatic cycling profile of the as-prepared pristine material at the current density of 0.1C. <b>b)</b> Initial dQ/dV image of the PRI at the current density of 0.1 C.....                                                               | 5 |
| <b>Figure S7.</b> <b>a)</b> Medium voltage versus cycle number plot PRI samples at 1C. <b>b)</b> Normalized charge-discharge curves of the PRI sample in the 10 <sup>th</sup> , 50 <sup>th</sup> , 100 <sup>th</sup> , 150 <sup>th</sup> and 200 <sup>th</sup> cycles at 1 C ..... | 6 |
| <b>Figure S8.</b> Charge-discharge curves of <b>a)</b> PRI and <b>b)</b> CA-LR materials at 1 C between 2.0 and 4.8 V. ....                                                                                                                                                        | 6 |
| <b>Figure S9.</b> Cycling performance of the Li-rich material before and after citric acid treatment between 2.0 and 4.8 V with current density of 1 C.....                                                                                                                        | 7 |
| <b>Figure S10.</b> Equivalent electric circuit used to fit the experimental. ....                                                                                                                                                                                                  | 7 |
| <b>Figure S11.</b> a) Ni 2p, b) Mn 2p, c) P 2p and d) Mn 3s X-ray photoelectron spectroscopy                                                                                                                                                                                       |   |

spectra after 200 cycles. ....8

**2. Supplementary Tables:**

**Table S1.** Lattice parameters of the samples. ....9

**Table S2.** Occupancy of atoms in PRI and CA-LR sample as calculated by Rietveld refinement. ....10

**Table S3.** Area ratios of peak I, II and III in Raman spectra of the three samples.....11

**Table S4.** Parameters for electrochemical impedance spectroscopy in term of the fitted results. ....11

**Table S5.** Diffusion coefficient of  $\text{Li}^+$  for PRI and CA-LR samples before and after charged to 4.8V. ....11

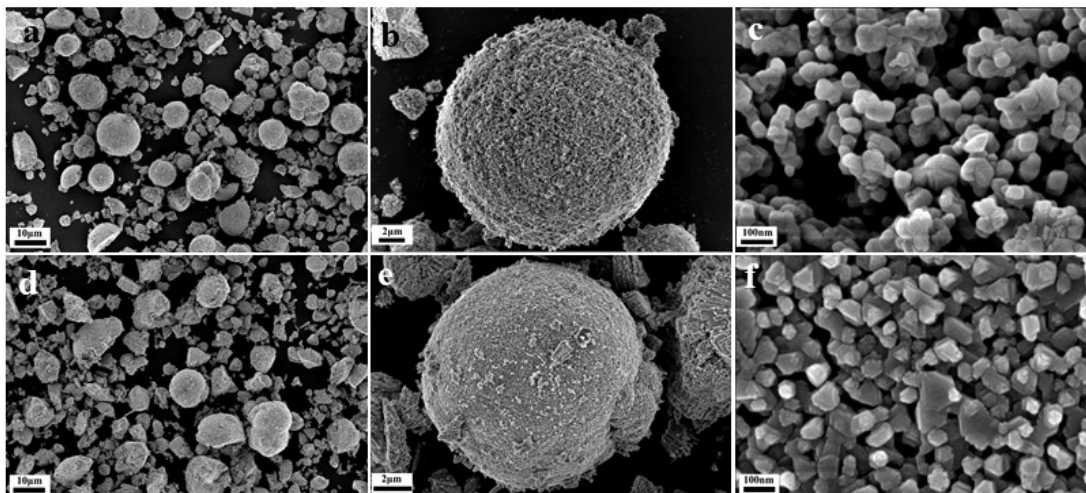

**Figure S1.** Scanning electron microscope images of various CA-treatment: **a)** 50g/L CA-treatment and **b)** 210g/L CA-treatment.

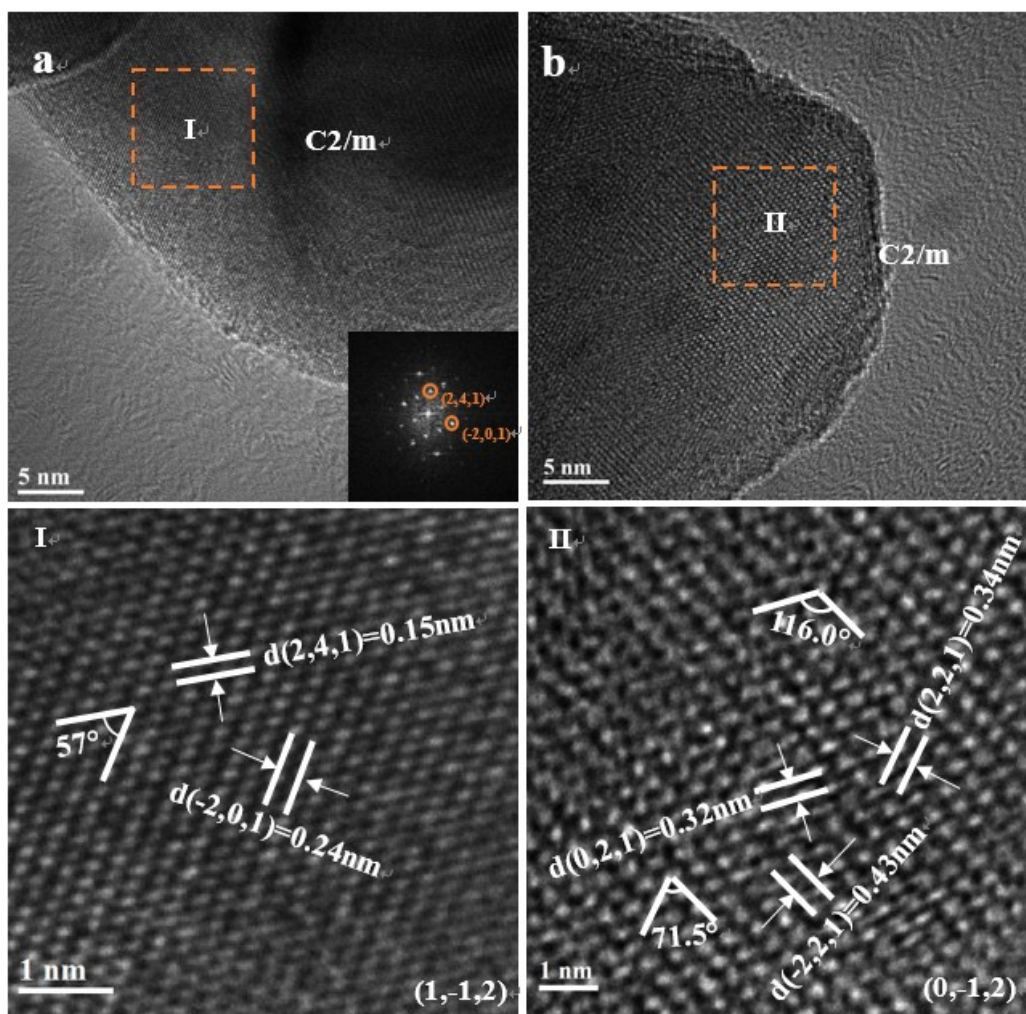

**Figure S2.** Transmission electron microscope images of the as-prepared PRI materials.

**Figure S2** shows a selected domain of the transmission electron microscope images for the as-prepared PRI materials, which belong to the monoclinic structure of  $\text{Li}_2\text{MnO}_3$  with spcing group of  $C2/m$ . Figure S2a shows a zone axis along  $(1,-1,2)$ , which d-spacings was 0.15 and 0.24nm belongs to the  $(2,4,1)$  and  $(-2,0,1)$  planes, respectively, for the angle of  $57^\circ$ , and the slight and sharp FFT pattern was conducted. Another area of the PRI materials showed the  $(0,-1,2)$  zone axis along the  $(0,2,1)$ ,  $(2,2,1)$  and  $(-2,2,1)$  planes, for d-spacing of 0.32nm, 0.34nm and 0.43nm, respectively, and the included angle was  $71.5^\circ$  and  $116.0^\circ$ .

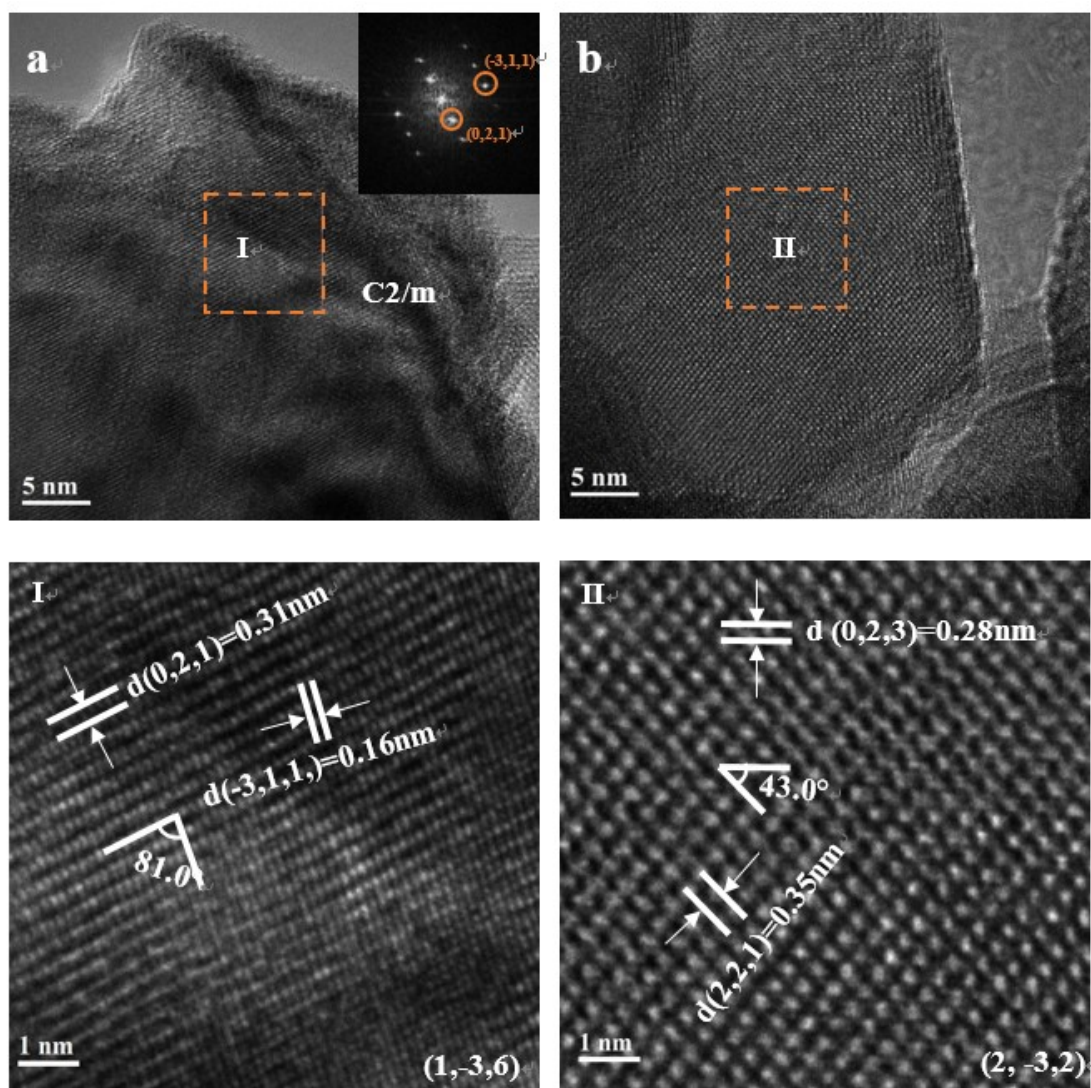

**Figure S3.** Transmission electron microscope images of the as-prepared CA-LR materials.

In addition, **Figure S3a** showed the diffuse streak pattern and the corresponding FFT pattern of the CA-LR materials, indexed to the  $\text{Li}_2\text{MnO}_3$  phase (C2/m spacing group) along the  $(1,-3,6)$  zone axis, and d-spacing of 0.16 and 0.31nm, with the included angle of  $81.0^\circ$ . It was worthy to note that diffuse streak was indistinct, which was due to the treatment of citric acid to pre-activate the  $\text{Li}_2\text{MnO}_3$  phase. Another region in Figure S3b showed the well-defined lattice stripe along  $(2,-3,2)$  zone axis, for d-spacing of 0.35 and 0.28nm, with the angle of  $43.0^\circ$ .

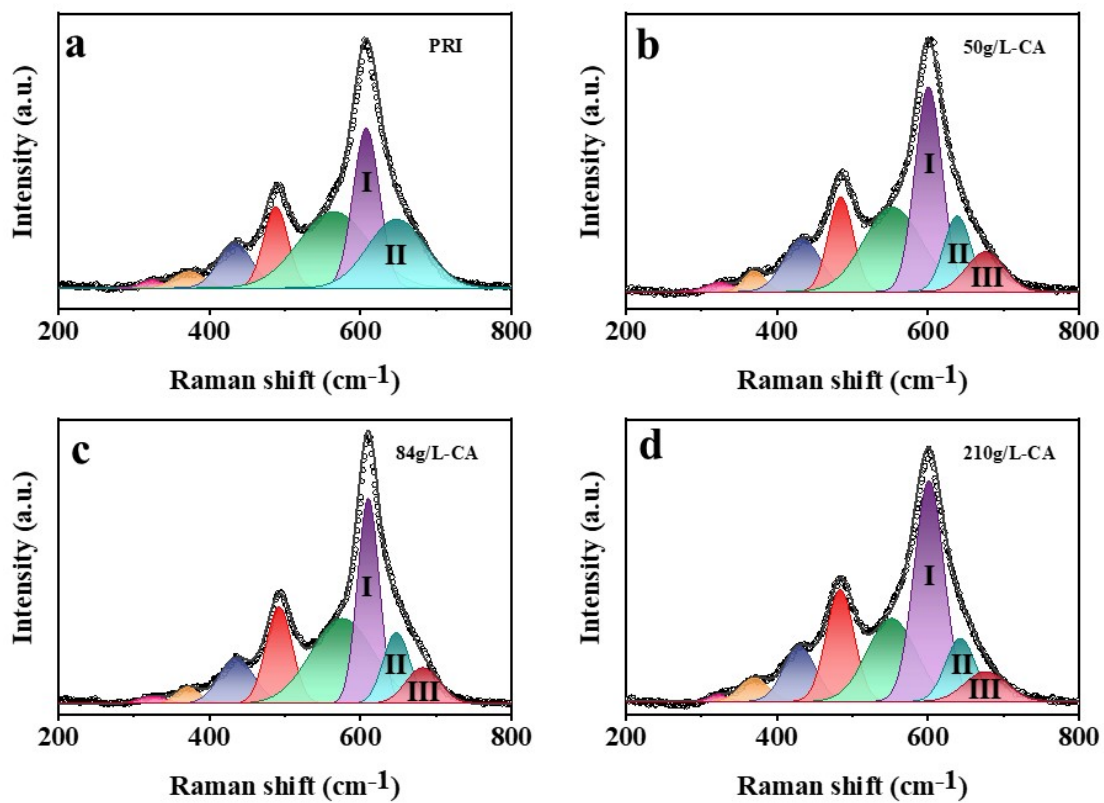

**Figure S4.** Raman spectra before cycling. a) PRI, b) 50g/L-CA, c) 84g/L-CA and d) 210g/L-CA samples.

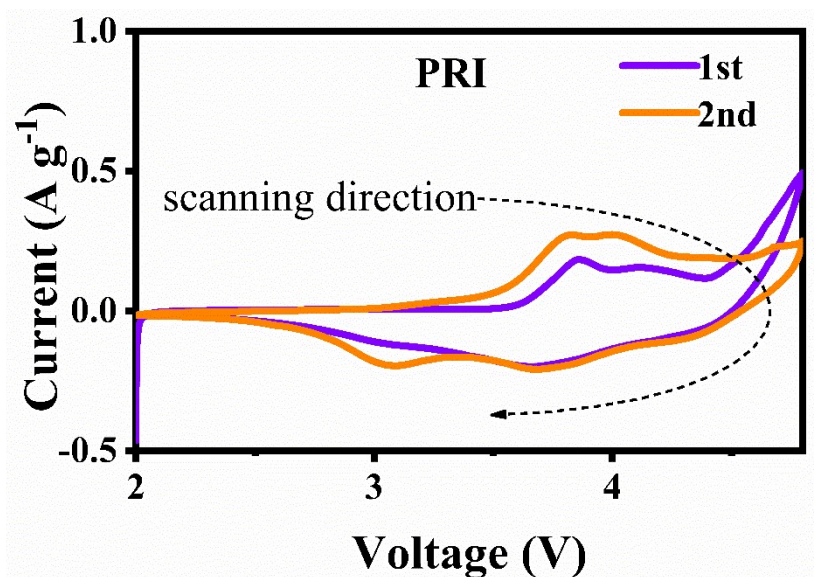

**Figure S5.** Cycle voltammetry curves of the as-prepared pristine material at the scan rate of  $0.1 \text{ mV s}^{-1}$  starting from the oxidation process under the 1<sup>st</sup> and 2<sup>nd</sup> cycle.

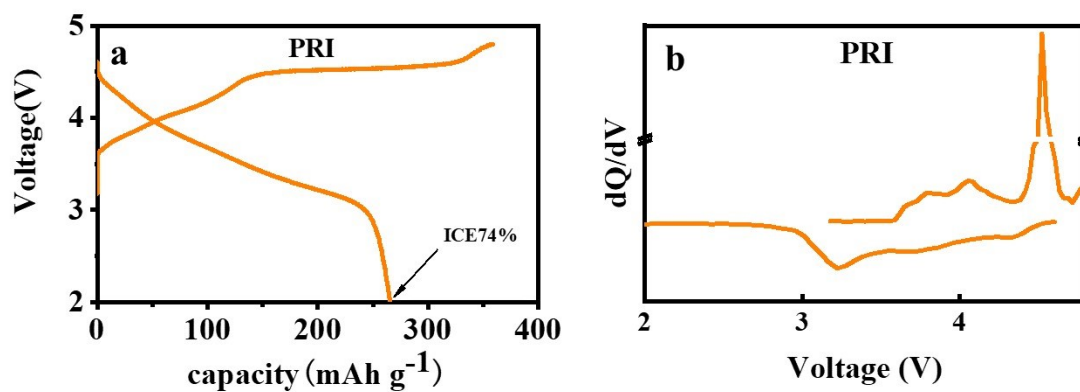

**Figure S6.** a) Initial galvanostatic cycling profile of the as-prepared pristine material at the current density of  $0.1 \text{ C}$ . b) Initial  $dQ/dV$  image of the PRI at the current density of  $0.1 \text{ C}$ .



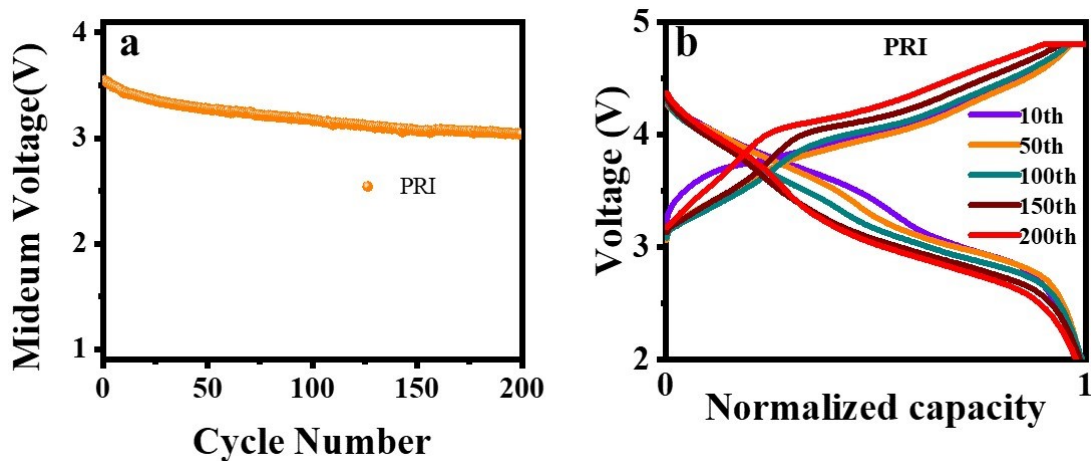

**Figure S7.** a) Medium voltage versus cycle number plot PRI samples at 1C. b) Normalized charge-discharge curves of the PRI sample in the 10<sup>th</sup>, 50<sup>th</sup>, 100<sup>th</sup>, 150<sup>th</sup> and 200<sup>th</sup> cycles at 1 C

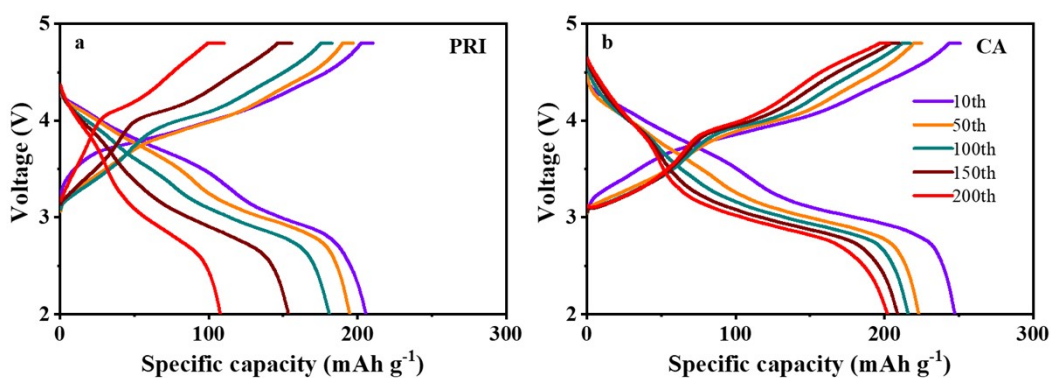

**Figure S8.** Charge-discharge curves of a) PRI and b) CA-LR materials at 1 C between 2.0 and 4.8 V.

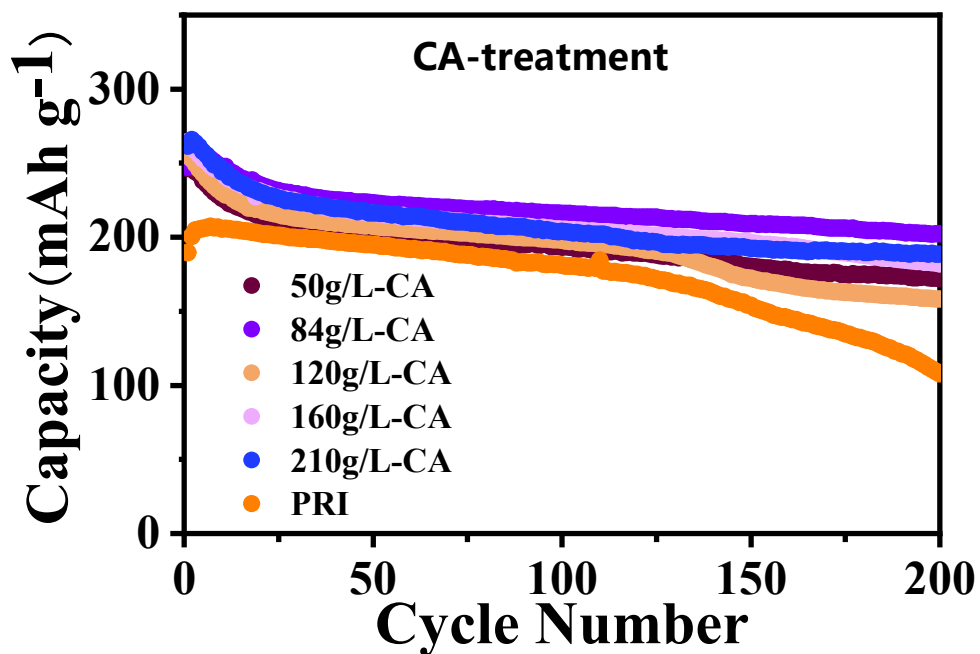

Figure S9. Cycling performance of the Li-rich material before and after citric acid treatment between 2.0 and 4.8 V with current density of 1 C.

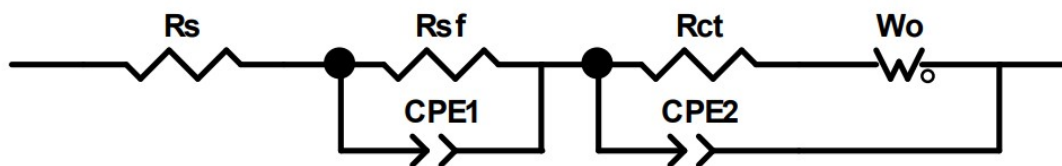

Figure S10. Equivalent electric circuit used to fit the experimental.

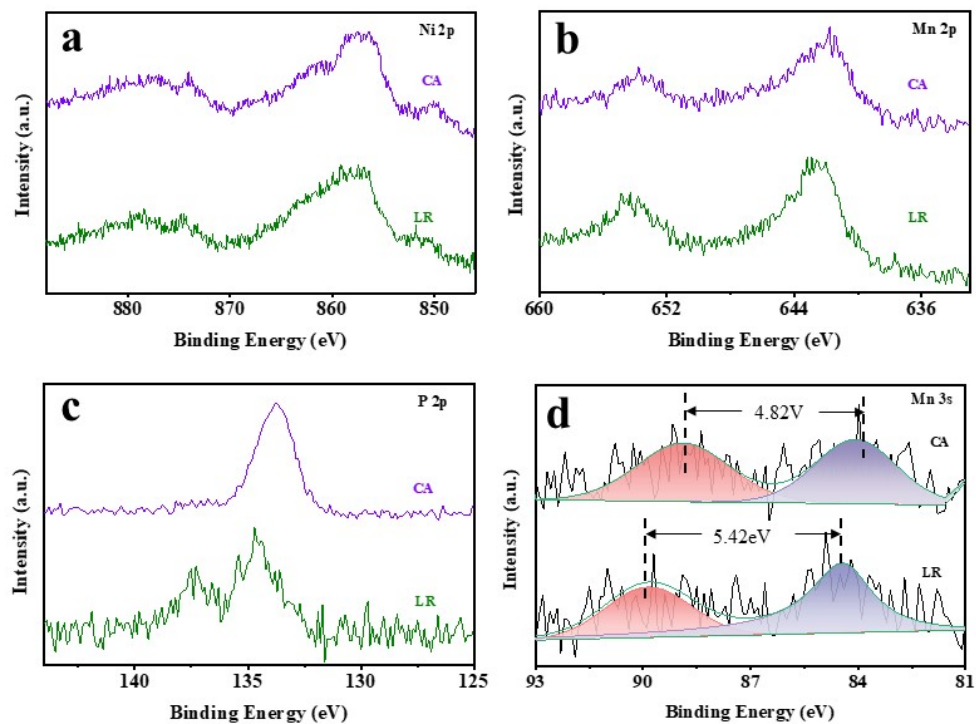

**Figure S11.** a) Ni 2p, b) Mn 2p, c) P 2p and d) Mn 3s X-ray photoelectron spectroscopy spectra after 200 cycles.

**Table S1.** Lattice parameters of the samples.

| <b>sample</b>                |               |                    | <b>PRI</b> | <b>CA-LR</b> |
|------------------------------|---------------|--------------------|------------|--------------|
| <b>Lattice<br/>parameter</b> | R-3m<br>phase | a(Å)               | 2.8594     | 2.8601       |
|                              |               | c(Å)               | 14.2566    | 14.2649      |
|                              |               | V(Å <sup>3</sup> ) | 100.95     | 101.06       |
|                              |               | c/a                | 4.9859     | 4.9876       |

**Table S2.** Occupancy of atoms in PRI and CA-LR sample as calculated by Rietveld refinement.

| <b>Sample</b> | <b>Atom</b> | <b>Site</b> | <b>x</b> | <b>y</b> | <b>z</b> | <b>Occupancy</b> | <b>Mental in Li 3a site</b> |
|---------------|-------------|-------------|----------|----------|----------|------------------|-----------------------------|
| <b>PRI</b>    | Li          | 3a          | 0        | 0        | 0        | 0.9573           | 4.27%                       |
|               | Ni          | 3a          | 0        | 0        | 0        | 0.0427           |                             |
|               | Li          | 3b          | 0        | 0        | 0.5      | 0.0427           |                             |
|               | Ni          | 3b          | 0        | 0        | 0.5      | 0.4573           |                             |
|               | Mn          | 3b          | 0        | 0        | 0.5      | 0.5000           |                             |
|               | O           | 6c          | 0        | 0        | 0.242    | 1.0000           |                             |
| <b>Sample</b> | <b>Atom</b> | <b>Site</b> | <b>x</b> | <b>y</b> | <b>z</b> | <b>Occupancy</b> | <b>Mental in Li 3a site</b> |
| <b>CA-LR</b>  | Li          | 3a          | 0        | 0        | 0        | 0.9152           | 8.48%                       |
|               | Ni          | 3a          | 0        | 0        | 0        | 0.0848           |                             |
|               | Li          | 3b          | 0        | 0        | 0.5      | 0.0848           |                             |
|               | Ni          | 3b          | 0        | 0        | 0.5      | 0.4152           |                             |
|               | Mn          | 3b          | 0        | 0        | 0.5      | 0.5000           |                             |
|               | O           | 6c          | 0        | 0        | 0.242    | 1.0000           |                             |

**Table S3.** Area ratios of peak I, II and III in Raman spectra of the three samples.

| <b>sample</b>    | <b>Peak I (%)</b> | <b>Peak II (%)</b> | <b>Peak III (%)</b> |
|------------------|-------------------|--------------------|---------------------|
| <b>PRI</b>       | 51.4              | 48.6               | 0                   |
| <b>50g/L-CA</b>  | 61.0              | 22.5               | 16.5                |
| <b>84g/L-CA</b>  | 58.9              | 25.0               | 16.1                |
| <b>210g/L-CA</b> | 67.7              | 19.4               | 12.9                |

**Table S4.** Parameters for electrochemical impedance spectroscopy in term of the fitted results.

| <b>sample</b>   | <b>R<sub>s</sub> (Ω)</b> | <b>R<sub>sf</sub> (Ω)</b> | <b>R<sub>ct</sub> (Ω)</b> | <b>R<sub>total</sub> (Ω)</b> |
|-----------------|--------------------------|---------------------------|---------------------------|------------------------------|
| <b>PRI</b>      | 2.615                    | 214.8                     | 908.8                     | 1126.2                       |
| <b>PRI-4.8V</b> | 4.026                    | 86.3                      | 1805                      | 1895.3                       |
| <b>CA</b>       | 1.683                    | 138.2                     | 7.269×10 <sup>-2</sup>    | 140.0                        |
| <b>CA-4.8V</b>  | 2.196                    | 127.8                     | 407.6                     | 537.6                        |

**Table S5.** Diffusion coefficient of Li<sup>+</sup> for PRI and CA-LR samples before and after charged to 4.8V.

|                           | <b>PRI</b>             | <b>PRI-4.8V</b>        | <b>CA</b>              | <b>CA-4.8V</b>         |
|---------------------------|------------------------|------------------------|------------------------|------------------------|
| <b>D (Li<sup>+</sup>)</b> | 5.60×10 <sup>-17</sup> | 2.19×10 <sup>-16</sup> | 9.51×10 <sup>-17</sup> | 4.00×10 <sup>-15</sup> |
